# Supplementary material for: Pre-Hospital Delay in Acute Ischemic Stroke Care: Current Findings and Future Perspectives in a Tertiary Stroke Center from Romania—A Cross-Sectional Study
Source: Medicina (Kaunas). 2022 Jul 27;58(8):1003. doi: 10.3390/medicina58081003 (PMC9415394; doi:10.3390/medicina58081003)
Supplement: Supplementary file 1 [file medicina-58-01003-s001.zip › medicina-1772738-supplementary.pdf]

*Table S1. Baseline characteristics of the study population.*

|                                                 | <i>n (%)*</i>  |
|-------------------------------------------------|----------------|
| Number of patients                              | 770            |
| Age (years), median (25 – 75 IQR)               | 73 (64.5 – 80) |
| Male sex                                        | 376 (48.8%)    |
| <b><i>Previous history</i></b>                  |                |
| Previous stroke/TIA                             | 176 (22.8%)    |
| Hypertension                                    | 538 (69.9%)    |
| Diabetes mellitus                               | 192 (24.9%)    |
| Atrial fibrillation                             | 160 (20.7%)    |
| Ischemic heart disease                          | 124 (16.1%)    |
| Active smoking/ former smoker                   | 169 (22.2%)    |
| Cognitive impairment                            | 86 (11.2%)     |
| BMI ≥ 30                                        | 198 (25.7%)    |
| <b><i>Previous therapy</i></b>                  |                |
| Antiplatelets                                   | 236 (31.1%)    |
| Anticoagulants                                  | 105 (13.8%)    |
| Antihypertensives                               | 443 (58.2%)    |
| Statins                                         | 196 (25.7%)    |
| <b><i>Origin</i></b>                            |                |
| Home                                            | 678 (88.2%)    |
| Other hospital/medical institution/nursing home | 71 (9.2%)      |
| Public place                                    | 21 (2.6%)      |
| <b><i>Place of living</i></b>                   |                |
| Urban areas                                     | 556 (72.2%)    |
| Rural areas                                     | 214 (27.8%)    |
| <b><i>Education</i></b>                         |                |
| Primary/secondary education                     | 626 (81.3%)    |
| Higher education                                | 144 (18.7%)    |
| <b><i>Living status</i></b>                     |                |
| Lives alone                                     | 167 (21.7%)    |
| Lives with family                               | 603 (78.3%)    |
| <b><i>Previous level of dependence</i></b>      |                |
| mRS 0-1                                         | 530 (68.9%)    |
| mRS 2-3                                         | 149 (19.3%)    |
| mRS 4-5                                         | 91 (11.8%)     |
| <b><i>Transport to hospital</i></b>             |                |
| By ambulance                                    | 582 (75.6%)    |
| By own means                                    | 188 (24.4%)    |
| <b><i>Stroke severity</i></b>                   |                |
| NIHSS at admission, median (25-75 IQR)          | 6 (3-14)       |
| <b><i>Stroke territory</i></b>                  |                |
| Left MCA or ACA                                 | 268 (35.1%)    |
| Right MCA or ACA                                | 243 (31.8%)    |
| Vertebro-basilar                                | 225 (29.4%)    |
| Multiple territories                            | 28 (3.7%)      |
| <b><i>Treatment by IVT</i></b>                  | 109 (14.1%)    |
| <i>* unless otherwise specified</i>             |                |

*Questionnaire regarding pre-hospital delay for patients with acute ischemic stroke*

1. Stroke symptoms were first noticed at wake – up? YES/ NO
2. Were there any witnesses at the time of stroke onset? YES/ NO
3. Date and time when the patient was last seen without symptoms:  
Date \_/ \_/ \_ \_ \_ \_ (DD/MM/YEAR)  
Time \_ \_ : \_ \_
4. *For patients with wake-up strokes*  
Date and time when the patient went to sleep:  
Date \_/ \_/ \_ \_ \_ \_ (DD/MM/YEAR)  
Time \_ \_ : \_ \_  
  
Date and time of awakening:  
Date \_/ \_/ \_ \_ \_ \_ (DD/MM/YEAR)  
Time \_ \_ : \_ \_
5. Date and time of first call to Ambulance:  
Date \_/ \_/ \_ \_ \_ \_ (DD/MM/YEAR)  
Time \_ \_ : \_ \_
6. Date and time of hospital arrival:  
Date \_/ \_/ \_ \_ \_ \_ (DD/MM/YEAR)  
Time \_ \_ : \_ \_
